# Supplementary material for: Is the Combination of Insecticide and Mating Disruption Synergistic or Additive in Lightbrown Apple Moth, Epiphyas postvittana?
Source: PLoS One. 2016 Aug 8;11(8):e0160710. doi: 10.1371/journal.pone.0160710 (PMC4976986; doi:10.1371/journal.pone.0160710)
Supplement: S2 Table — (XLSX) [file pone.0160710.s002.xlsx]

## Sheet: Sheet1
TR 1 = Control, TR2 = Isomate, TR 3 = SPLAT MD, TR 4 = SPLAT+Permetrin (A&K)
			2010-04-01	2010-04-04	2010-04-09	2010-04-16	2010-04-23	2010-04-30	2010-05-07	2010-05-14	2010-05-21
TR	REP	TRAP	POST1	POST2	POST3	POST4	POST5	POST6	POST7	POST8	POST9
1	1	1	0	0	0	0	0	0	0	0	0
1	1	2	0	0	0	0	0	0	0	0	0
1	1	3	0	0	0	0	0	0	1	0	0
1	1	4	0	0	0	0	0	0	1	0	0
1	1	5	0	0	0	0	0	0	0	0	0
1	2	1	0	0	0	2	0	0	0	0	0
1	2	2	0	0	0	1	0	0	0	0	0
1	2	3	1	1	2	2	2	1	0	0	4
1	2	4	0	1	1	2	6	2	1	0	4
1	2	5	1	0	0	0	1	0	0	0	0
1	3	1	0	0	0	0	0	0	0	0	1
1	3	2	0	0	0	1	0	0	2	1	2
1	3	3	0	2	0	0	2	1	2	2	1
1	3	4	1	1	1	0	10	3	5	5	1
1	3	5	1	1	0	1	15	7	10	3	4
1	4	1	0	0	0	0	2	0	0	0	2
1	4	2	0	0	0	0	0	0	0	0	1
1	4	3	0	0	1	0	5	7	5	3	2
1	4	4	0	1	1	0	4	2	5	3	1
1	4	5	0	0	1	1	1	3	6	5	5
2	1	1	0	0	0	0	0	0	0	0	0
2	1	2	0	0	0	0	0	0	0	0	0
2	1	3	0	0	0	0	0	0	0	0	0
2	1	4	0	0	0	0	0	0	0	0	0
2	1	5	0	0	0	0	0	0	0	0	0
2	2	1	0	0	0	0	0	0	0	0	0
2	2	2	0	0	0	0	0	0	0	0	0
2	2	3	0	0	0	0	0	0	0	0	0
2	2	4	0	1	0	0	0	0	0	0	0
2	2	5	0	0	0	0	0	0	0	0	0
2	3	1	0	0	0	0	0	0	0	0	0
2	3	2	0	0	0	0	0	0	0	0	0
2	3	3	0	0	0	0	0	0	0	0	0
2	3	4	0	0	0	0	0	0	0	0	0
2	3	5	0	0	0	0	0	0	0	0	0
2	4	1	0	0	0	0	0	0	0	0	0
2	4	2	0	0	0	0	0	0	0	0	0
2	4	3	0	0	0	0	0	0	0	0	0
2	4	4	0	0	0	0	0	0	0	0	0
2	4	5	0	0	0	0	0	0	0	0	0
3	1	1	0	0	0	0	0	0	0	0	0
3	1	2	0	0	0	0	0	0	0	0	0
3	1	3	0	0	0	0	0	0	0	0	0
3	1	4	0	0	0	0	0	0	0	0	0
3	1	5	0	0	0	0	0	0	0	0	0
3	2	1	0	0	0	0	0	0	1	0	0
3	2	2	0	0	0	0	0	0	0	0	0
3	2	3	0	0	0	0	0	0	0	0	0
3	2	4	0	0	0	0	0	0	0	0	0
3	2	5	0	0	0	0	0	0	0	0	0
3	3	1	0	0	0	0	0	0	0	0	0
3	3	2	0	0	0	0	0	0	0	0	0
3	3	3	0	0	0	0	0	0	0	0	0
3	3	4	0	0	0	0	0	0	0	0	1
3	3	5	0	0	0	0	0	1	0	0	0
3	4	1	0	0	0	0	0	0	0	0	0
3	4	2	0	0	0	0	0	0	0	0	0
3	4	3	0	0	0	0	0	0	0	0	0
3	4	4	0	0	0	0	0	0	0	0	0
3	4	5	0	0	0	0	0	0	0	0	0
4	1	1	0	0	0	0	0	0	0	0	0
4	1	2	0	0	0	0	0	0	0	0	0
4	1	3	0	0	0	0	0	0	0	0	0
4	1	4	0	0	0	0	0	0	0	0	0
4	1	5	0	0	0	0	0	0	0	0	0
4	2	1	0	0	0	0	0	0	0	0	0
4	2	2	0	0	0	0	0	0	1	0	0
4	2	3	0	0	0	0	0	0	0	0	0
4	2	4	0	0	0	0	0	0	0	0	0
4	2	5	0	0	0	0	0	0	0	0	0
4	3	1	0	0	0	0	0	0	0	0	0
4	3	2	0	0	0	0	0	0	0	0	0
4	3	3	0	0	0	1	0	1	0	0	0
4	3	4	0	0	0	0	0	0	0	0	0
4	3	5	0	0	0	0	0	0	0	0	0
4	4	1	0	0	0	0	0	0	0	0	0
4	4	2	0	0	0	0	0	0	0	0	0
4	4	3	0	0	0	0	0	0	0	0	0
4	4	4	0	0	0	0	0	0	0	1	0
4	4	5	0	0	0	0	0	0	0	0	0
