# Supplementary material for: Is the Combination of Insecticide and Mating Disruption Synergistic or Additive in Lightbrown Apple Moth, Epiphyas postvittana?
Source: PLoS One. 2016 Aug 8;11(8):e0160710. doi: 10.1371/journal.pone.0160710 (PMC4976986; doi:10.1371/journal.pone.0160710)
Supplement: S6 Table — (XLSX) [file pone.0160710.s006.xlsx]

## Sheet: Sheet1
Date of set up 36 female cages: 1.12.2011; Mating (=1), with 1 Female per cage (Unmated=0)
TR 1 = Control, TR2 = SPRAY ONLY, TR 3 = SPRAY-SPLAT
			1ST	2nd	3rd	4th	5th	6th	7th	8th	9th	10th	11th	12th	13th	14th	15th	16th	17th	18th
TR	REP	TRAP	08.12.11	15.12.11	22.12.11	29.12.11	05.01.12	12.01.12	19.01.12	26.01.12	02.02.12	10.02.12	21.02.12	28.02.12	06.03.12	13.03.12	23.03.12	17.04.12	24.04.12	30.04.12
1	1	1	0	0	0	0	1	0	0	0	0	0	0	0	0	0	0	0	0	0
1	1	2	0	0	0	0	0	0	0	0	0	0	0	0	0	0	0		0	0
1	1	3	1	0	0	0	0	0	0	0	0	0	0	0	0	0	0	0	0	1
1	1	4	0	0	0	0	0	0	0	0	0	0	0	0	0	0	0	0	0	0
1	2	1	0	1	0	0	0	0	0	0	0	0	0	0	0	0	0		0	0
1	2	2	0	0	0	0	0	0	0	0	0	0	0	0	0	0	0		1	0
1	2	3	0	0	0	0	1	0	0	0	0	0	0	0	0	0	0		0	0
1	2	4	0	0	1	0	0	1	0	0	0	0	0	0	0	0	0		0	0
1	3	1	0	0	1	0	0	0	0	0	0	0	1	0	0	0	0		1	0
1	3	2	0	1	0	1	0	1	0	0	0	0	0	0	0	0	1	0	0	1
1	3	3	1	0	0	0	0	1	0	0	0	0	0	0	0	0	0		0	0
1	3	4	0	0	0	0	0	0	0	0	0	1	0	0	0	0	0	0	0	0
2	1	1	0	0	0	0	0	1	0	0	0	0	0	0	0	0	0	0	0	0
2	1	2	0	1	0	0	0	1	0	0	0	0	0	0	0	0	0	0	0	0
2	1	3	0	0	0	0	0	0	0	0	0	0	0	0	0	0	0		0	0
2	1	4	0	0	0	0	0	0	0	0	0	1	0	0	0	0	0		0	0
2	2	1	0	0	0	0	0	0	0	1	0	0	0	0	0	0	0	0	0	0
2	2	2	0	0	0	0	0	0	0	0	0	0	0	0	0	0	0		0	0
2	2	3	0	0	0	0	0	0	0	0	0	0	0	0	0	0	0	0	0	0
2	2	4	0	0	0	0	0	1	0	0	0	0	0	0	0	0	0	0	0	0
2	3	1	0	0	0	0	0	0	0	0	0	0	0	0	0	0	0	0	0	1
2	3	2	0	0	0	1	0	0	0	0	0	0	0	0	0	0	0	0	0	0
2	3	3	0	0	0	0	0	0	0	0	0	0	0	0	0	0	0		0	0
2	3	4	0	0	0	0	0	0	0	0	0	0	0	0	0	0	1	0	1	0
3	1	1	0	0	0	0	0	0	0	0	0	0	0	0	0		0		0	0
3	1	2	0	0	0	0	0	0	0	0	0	0	0	0	0		0	0	0	0
3	1	3	0	0	0	0	0	1	0	0	0	0	0	0	0		0		0	0
3	1	4	0	0	0	0	0	0	0	0	0	0	0	0	0		0	0	0	0
3	2	1	0	0	0	0	0	0	0	0	0	0	0	0	0		0	0	0	0
3	2	2	0	0	0	0	0	0	0	0	1	0	0	0	0		0		0	0
3	2	3	0	0	0	0	0	0	0	0	0	0	0	0	0		0	0	0	0
3	2	4	0	0	0	0	0	0	0	0	0	0	0	0	0		0		0	0
3	3	1	0	0	0	0	0	0	0	0	0	0	0	0	0		0	0	0	0
3	3	2	0	0	0	0	0	0	0	0	0	0	0	0	0		0	0	0	0
3	3	3	0	0	0	0	0	0	0	0	0	0	0	0	0		0	0	0	0
3	3	4	0	0	0	0	0	0	0	0	0	0	0	0	0		0	0	0	0
